# Supplementary material for: Impact of Pharmacological Inhibition of Hydrogen Sulphide Production in the SOD1G93A-ALS Mouse Model
Source: PubMed Central journal article supplement (PMC6567312; doi:10.3390/ijms20102550), 2019-05-24
Supplement: ijms-20-02550-s001.pdf [file ijms-20-02550-s001.pdf]

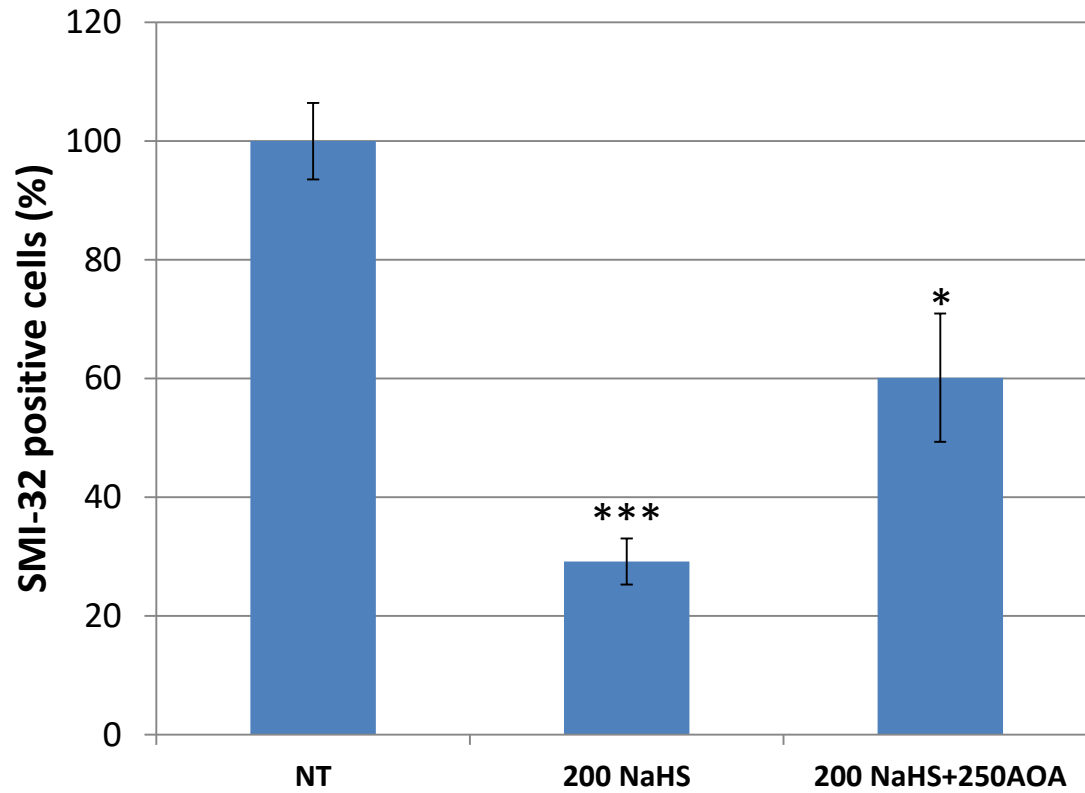

**Figure S1.** AOA spinal cord cultures treatment partially revert NaHS toxicity. As described in (20) and (71), the cultures at 10/12 DIV were exposed to the indicated concentrations of NaHS 200 $\mu$ M ( $n = 3$ ) with or without 250  $\mu$ M AOA ( $n = 3$ ) after 18 hrs were fixed and immunostained with SMI-32. The number of surviving cells was assessed by direct counting of SMI32-positive cells and normalized to the NT values ( $n = 4$ ). Each treatment was counted in triplicate. Data are presented as percentage and as mean  $\pm$  SEM, and values were compared by using Student  $t$  test. \*\*\* $p < 0.005$ , \* $p < 0.05$  vs NT.
